# Supplementary material
Source: publisher figshare collection journal article supplement (https://frontiersin.figshare.com/ndownloader/files/31777211)
Supplement: Supplementary file [file 31777211]

## Supplementary Figures and Tables

**Figure S1. Ndufa4l2 expression in kidney, testis, pancreas, and liver of adult TRACK males.** The different tissues were processed in parallel, and noticeable Ndufa4l2 expression (green) was found only in the kidney. DAPI nuclear staining (blue). Magnification; x200, scale bar; 100  $\mu$ m. Images were acquired from at least three independent animals. Representative images are shown.

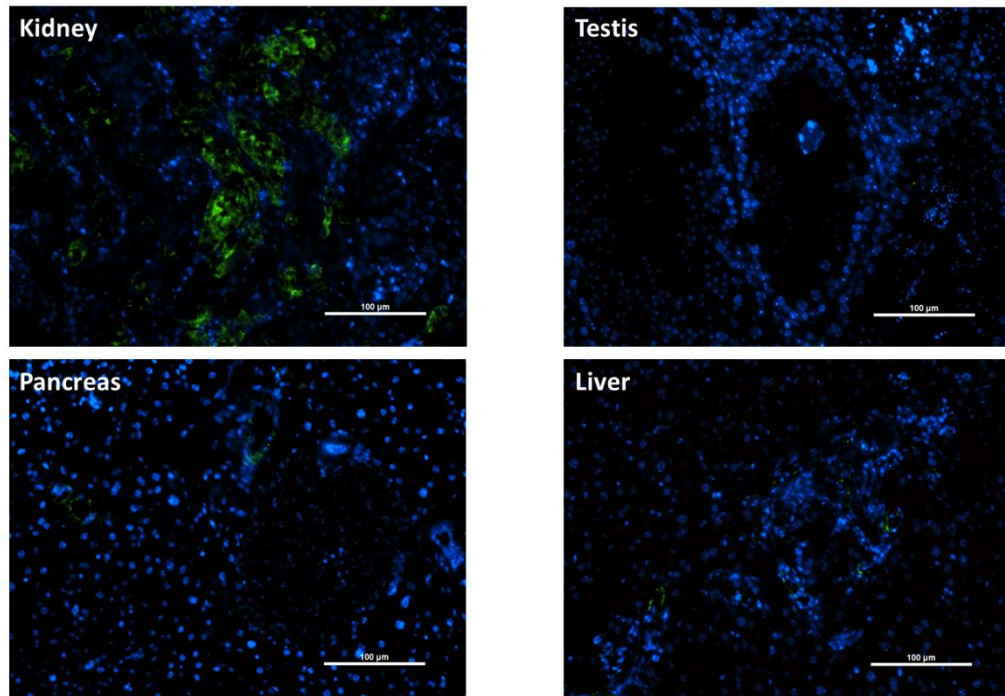

**Figure S2. Quantification of spatial overlap between Ndufa4l2 and GFP stainings.** Images of kidney cortices from five TANDu mice provided the input data for ImageJ analysis. The staining intensities of Ndufa4l2 (green) and GFP (red) were gated by automated thresholding, and the positive areas were quantified (Ndufa4l2;  $67\pm5\%$ , GFP;  $29\pm4\%$ ). The overlay between the two areas was measured relative to the total area stained ( $3.6\pm0.6\%$ ). As a positive control for overlapping staining, the overlap between Ndufa4l2 and Enolase1 was determined using the same algorithm (72%). Magnification; x200, scale bar; 100  $\mu\text{m}$ .

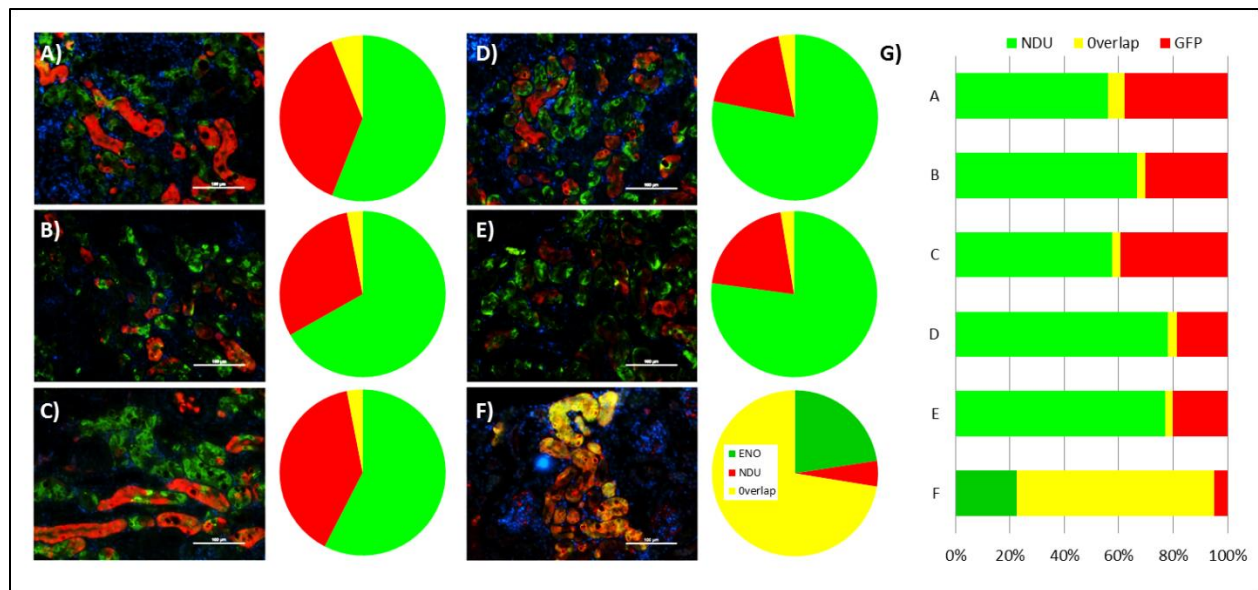

**Figure S3. Transgene expression in kidney, testis, pancreas, and liver of adult TANdu males.** The different tissues were processed in parallel, and noticeable GFP transgene expression (red) was found only in the kidney. Wheat germ agglutinin staining (WGA, green) provides structural information. DAPI nuclear staining (blue). Magnification; x200, scale bar; 100  $\mu$ m. Images were acquired from at least three independent animals. Representative images are shown.

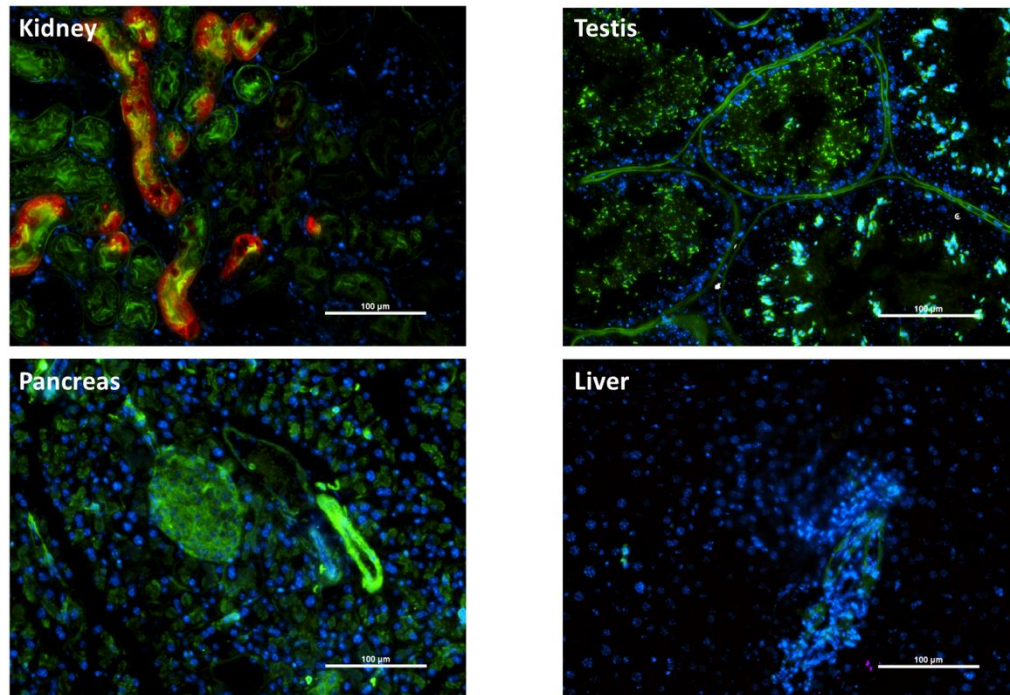



**Figure S4. Spatial overlap between stainings for GFP and markers of the proximal tubules.** Expression of GFP (shown in red) is restricted to a subset of proximal tubule cells positive for *Lotus Tetragonolobus* Lectin (LTL), gamma-glutamyltransferase-1 (Ggt1), Sodium/glucose cotransporter-1 (Sgt1), or Aquaporin-1 (Aqp1), all shown in green. Staining with Wheat germ agglutinin (WGA) and E-Cadherin (both in green) are shown for reference. Magnification; x200, scale bar; 100  $\mu$ m. Images were acquired from at least three independent animals. Representative images are shown.

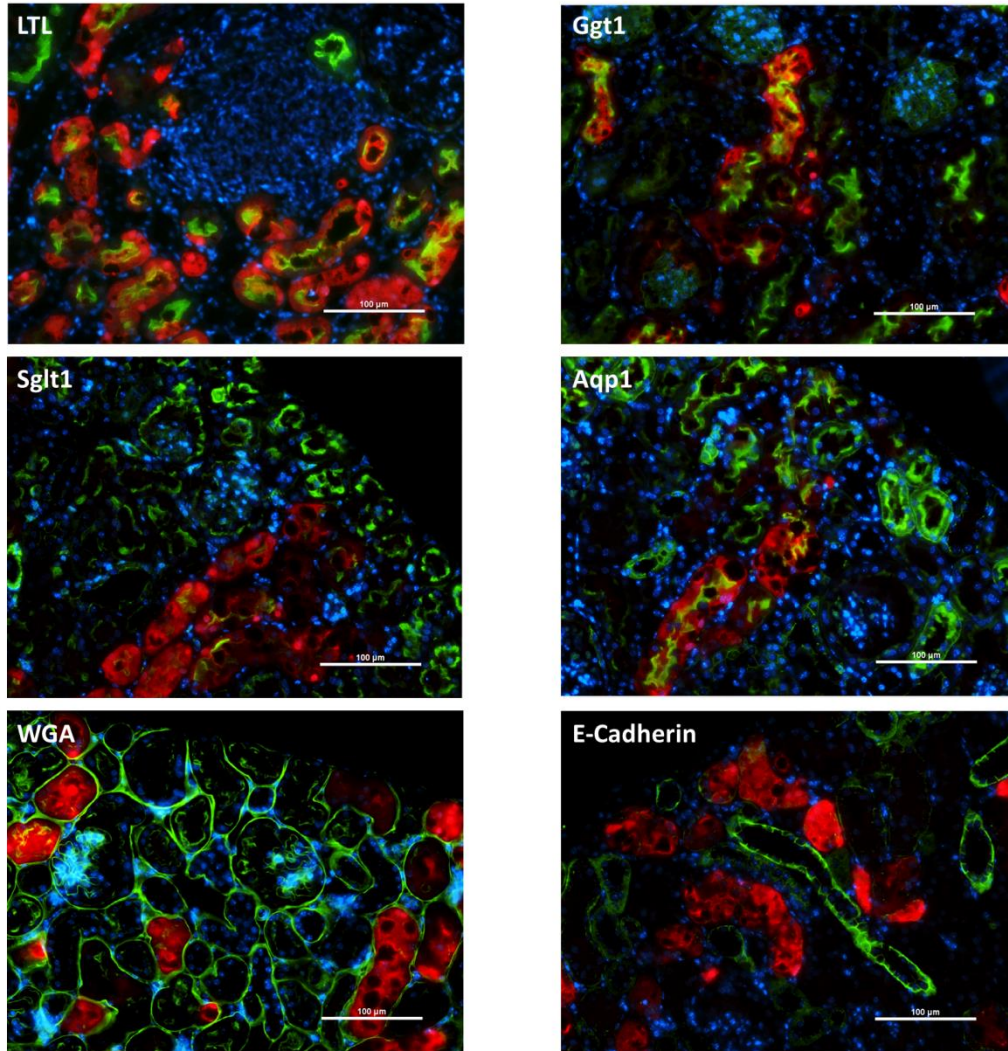

**Figure S5. Spatial Distribution of Fatty Acids depicted as heatmaps of WT, TANdu and TRACK kidneys.** Heatmaps indicate the relative levels of Palmitate, Stearate, Oleate, and Linoleate as determined by MALDI-IMS.

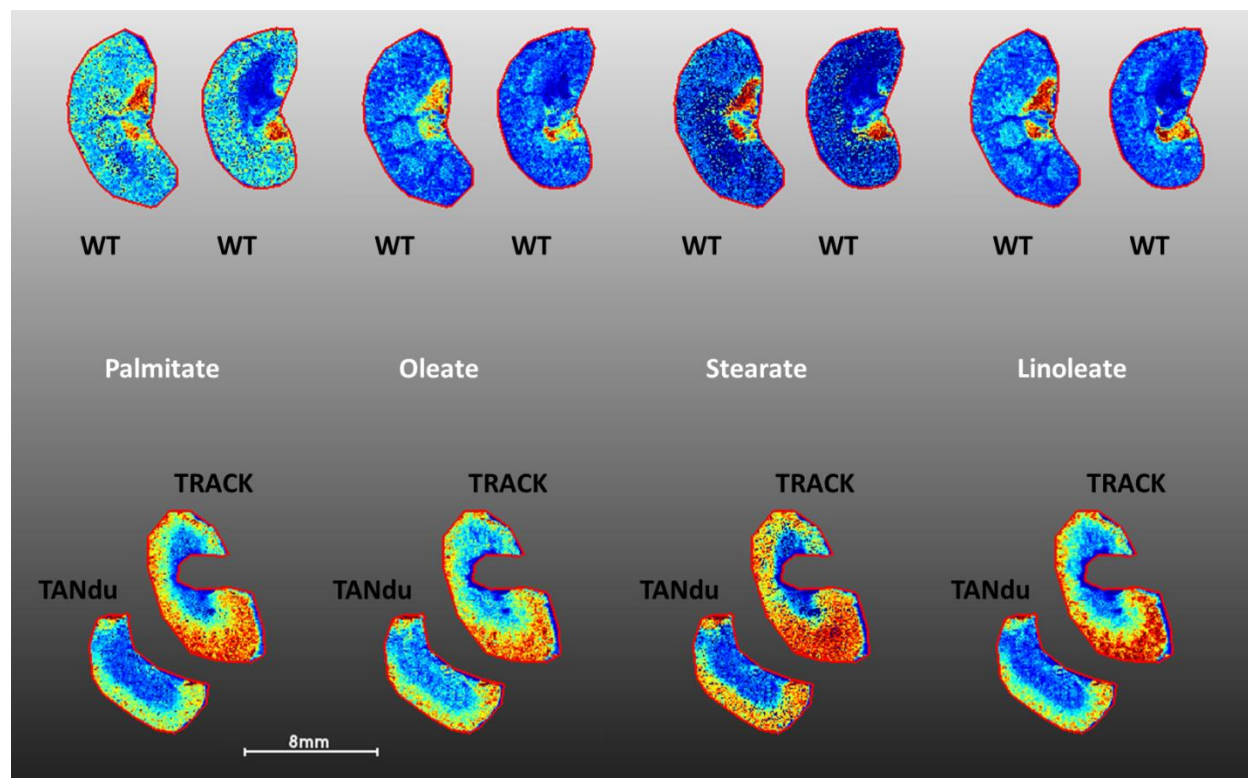

**Figure S6. Spatial Distribution of select metabolites depicted as heatmaps of WT, TANdu and TRACK kidneys.** Heatmaps indicate the relative levels of A) Hexose-phosphate, B) AMP, C) ADP, D) ATP, and E) Lactate as determined by MALDI-IMS.

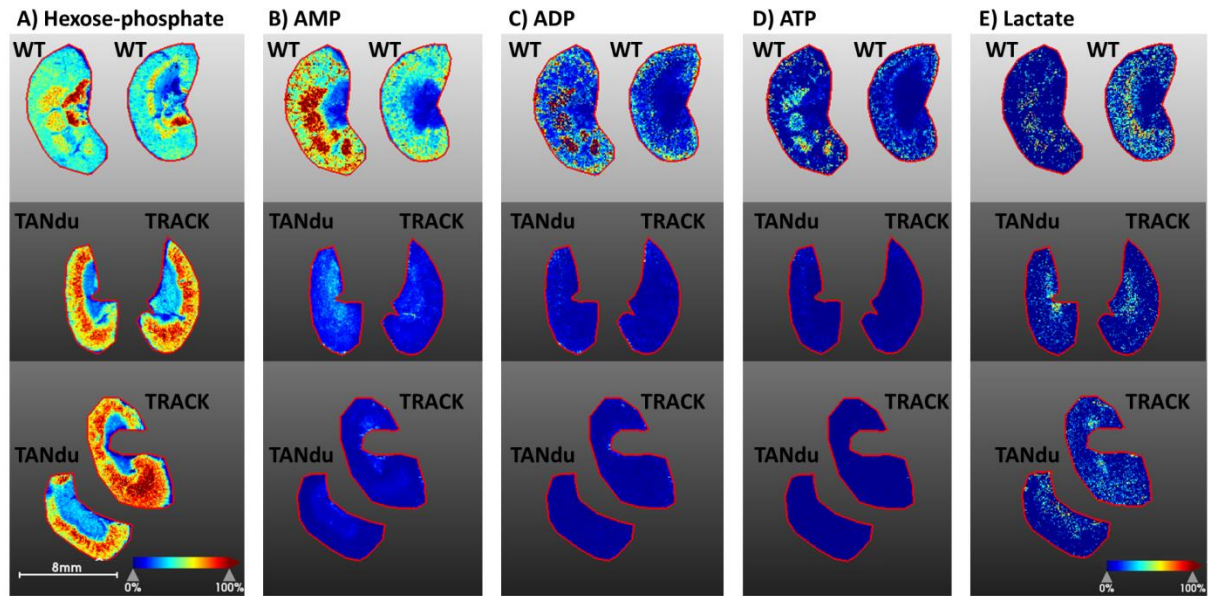

## Supplementary Tables

| Primer         | Sequence                                |
|----------------|-----------------------------------------|
| miRE-Eco-Rev   | TCTCGAATTCTAGCCCCCTTGAAGTCCGAGGCAGTAGGC |
| miRE-Xho-Fw    | TGAACTCGAGAAGGTATAT                     |
| mNdufa4l2(-)E4 | AAACGGCCGAATTTGTTAAATGAAATTGTATTTTGCCCA |
| mNdufa4l2(+)X1 | ATCGCTCGAGAAGACCAGACACTGGGACAAGAT       |

**Table S1.** Construction Primers. The miRE PCR products were cloned into the L3GGEPPIR and cTGME vectors. The Ndufa4l2 PCR product was cloned into psiCHECK2.

| Primer        | Sequence                    |
|---------------|-----------------------------|
| EGFP(-)       | CGCCGGACACGCTGAACTTGTG      |
| TRE3G(+)A     | ACCATGCATGTGTTTCGATTCT      |
| TETO(+)B      | GAGCTCGGTACCCGGGTCG         |
| tta507_F      | GCTGCTTAATGAGGTCGG          |
| tta507_R      | CTCTGCACCTTGGTGATC          |
| Col1A1(+)     | AATCATCCCAGGTGCACAGCATTGCGG |
| Col1A1(-)     | ACTTGAGGGCTCATGAACCTCCCAGG  |
| SAdpA(-)      | ATCAAGGAAACCCTGGACTACTGCG   |
| hHIF1aP564A-F | TTGGAGATGTTAGCTGCCTATATCCC  |
| hHIF1aN803A-R | AACTTCACAATCATAACTGGTCAGC   |

**Table S2.** Genotyping Primers.

| Forward       | Reverse       | gDNA | Description        |
|---------------|---------------|------|--------------------|
| Col1A1(+)     | Col1A1(-)     | 220  | Col1a1-WT          |
| Col1A1(+)     | SAdpA(-)      | 295  | Col1a1-Integration |
| tta507_F      | tta507_R      | 507  | GGT-tTA            |
| TRE3G(+)A     | EGFP(-)       | 526  | TRE3G (BPS)        |
| TETO(+)B      | EGFP(-)       | 261  | TetO (shRNA)       |
| hHIF1aP564A-F | hHIF1aN803A-R | 732  | TRACK              |

**Table S3.** PCR products for genotyping.

| Primer             | Sequence                                                         |
|--------------------|------------------------------------------------------------------|
| Adaptors           | TGCTGTTGACAGTGAGCG-----shRNA-----TGCCTACTGCCTCGGA                |
| NDUFA4L2.1152 #355 | ACGTGGGCAAAATACAATTTTCATAGTGAAGCCACAGATGTATGAAATTGTATTTTGCCACGG  |
| NDUFA4L2.1157 #361 | AGCAAAATACAATTTTCATTTAATAGTGAAGCCACAGATGTATTAAATGAAATTGTATTTTGCC |
| NDUFA4L2.477 #sh3  | ACAGTTTCCACTGACTATAAGATAGTGAAGCCACAGATGTATCTTATAGTCAGTGGAACTGC   |
| NDUFA4L2.463 #349  | CATACAAGTTCCTTGCGAGTTTATAGTGAAGCCACAGATGTATAAACTGCAAGGAACCTGTATT |
| NDUFA4L2.478 #sh5  | AAGTTTCCACTGACTATAAGAATAGTGAAGCCACAGATGTATTCTTATAGTCAGTGGAACTG   |
| NDUFA4L2.460 #sh6  | CCCAATACAAGTTCCTTGCGAGTTAGTGAAGCCACAGATGTAAGTCAAGGAACCTGTATTGGT  |
| NDUFA4L2.406 #367  | CCTGCTGGGACAGAAAGAACAATAGTGAAGCCACAGATGTATTGTTCTTTCTGTCCCAGCAGA  |
| NDUFA4L2.472 #sh8  | CCCTTGCGAGTTTCCACTGACTATAGTGAAGCCACAGATGTATAGTCAGTGGAACTGCAAGGA  |
| NDUFA4L2.266 #352  | ACGACTACAAGAAGCTGAAGAATAGTGAAGCCACAGATGTATTCTTCAGCTTCTTGTAGTCGG  |
| NDUFA4L2.243 #359  | ATACAAGTTCCTTGCCGTTTCATAGTGAAGCCACAGATGTATGAAACGGCAAGGAACCTGTAC  |
| NDUFA4L2.244 #360  | CACAAGTTCCTTGCCGTTTCAATAGTGAAGCCACAGATGTATTGAAACGGCAAGGAACCTGTAT |
| NDUFA4L2.39 #353   | AAAGATGGCAGGAAGTCTATAGTGAAGCCACAGATGTATAGACTAGTTCCTGCCATCTTG     |
| NDUFA4L2.304 #354  | CAAGTCAGAGATCTCCACGTAATAGTGAAGCCACAGATGTATTACGTGGAGATCTCTGACTTA  |
| NDUFA4L2.291 #350  | ACGGCCAGACTTCTAAGTCAGATAGTGAAGCCACAGATGTATCTGACTTAGAAGTCTGGCCGG  |
| NDUFA4L2.289 #356  | AACCGGCCAGACTTCTAAGTCATAGTGAAGCCACAGATGTATGACTTAGAAGTCTGGCCGGTC  |
| NDUFA4L2.316 #357  | ATCCACGTAAATCACTCTTTCTTAGTGAAGCCACAGATGTAAGAAAGAGTGATTTACGTGGAG  |
| NDUFA4L2.239 #358  | CCCAGTACAAGTTCCTTGCCGTTAGTGAAGCCACAGATGTAACGGCAAGGAACCTGTACTGGT  |
| NDUFA4L2.406 #369  | CCTGCTGGGACAGAAAGAACAATAGTGAAGCCACAGATGTATTGTTCTTTCTGTCCCAGCAGA  |
| NDUFA4L2.472 #370  | CCCTTGCGAGTTTCCACTGACTATAGTGAAGCCACAGATGTATAGTCAGTGGAACTGCAAGGA  |
| NDUFA4L2.1157 #513 | AGCAAAATACAATTTTCATTTAATAGTGAAGCCACAGATGTATTAAATGAAATTGTATTTTGCC |

**Table S4.** Hairpin sequences for Ndufa4l2 knockdown. The hairpin-sequences were PCR amplified with primers miRE-Eco-Rev\_oligo and miRE-Xho-Fw\_oligo (Table S1) and cloned into L3GGEPIR and cTGME vectors (Figure 2).



| <b>Target</b>   | <b>WB</b> | <b>IF</b> | <b>Catalog#</b> | <b>Lot#</b>  | <b>Company</b>  | <b>Specie</b> |
|-----------------|-----------|-----------|-----------------|--------------|-----------------|---------------|
| <b>Ndufa4l2</b> | 1:1000    | 1:200     | 16480-1         | 00007801     | ProteinTech     | rabbit        |
| <b>Eno1</b>     | 1:1000    | 1:200     | 11204-1-AP      | 00014144     | ProteinTech     | rabbit        |
| <b>GFP</b>      | 1:1000    | 1:200     | STJ140006       | 000666270214 | St.John's Lab   | goat          |
| <b>Car9</b>     | NA        | 1:200     | 50660-R001      | HA07MC0806   | Sino Biological | rabbit        |
| <b>Gpi1</b>     | 1:1000    | 1:200     | 15171-1-AP      | 00007145     | ProteinTech     | rabbit        |
| <b>Ggt1</b>     | NA        | 1:200     | A1776           | 0006510201   | AbClonal        | rabbit        |
| <b>Sgt1</b>     | NA        | 1:200     | PA5-88282       | WC3216903    | Thermo          | rabbit        |
| <b>Aqp1</b>     | NA        | 1:200     | MA5-32593       | WB3190355    | Thermo          | rabbit        |
| <b>E-Cad</b>    | NA        | 1:200     | 3195S           | 13           | Cell Signaling  | rabbit        |
| <b>LTL</b>      | NA        | 1:1000    | FL-1321         | ZF-0801      | Vector          | n/a           |
| <b>WGA</b>      | NA        | 1:1000    | L-4895          | ND           | Sigma           | n/a           |
| <b>rabbit</b>   | NA        | 1:500     | A32790          | TI271740     | Thermo          | donkey        |
| <b>goat</b>     | NA        | 1:500     | A32758          | TI271731     | Thermo          | donkey        |
| <b>actin</b>    | 1:5000    | NA        | MAB1501         | 2951837      | Millipore       | mouse         |
| <b>rabbit</b>   | 1:5000    | NA        | 711-035-152     | 110017       | JacksonLabs     | donkey        |
| <b>mouse</b>    | 1:5000    | NA        | 715-036-150     | 108896       | JacksonLabs     | donkey        |

**Table S5.** Anti-bodies used in the study.
